# Supplementary material for: New crystalline forms of permethylated β-cyclodextrin
Source: Royal Society of Chemistry journal article supplement (doi:10.1039/b408660k), 2004-01-01
Supplement: b408660k.doc [file b408660k.doc]

# ELECTRONIC SUPPLEMENTARY INFORMATION FOR THE PAPER

**‘New Crystalline Forms of Permethylated--cyclodextrin’,**

**M R Caira, S A Bourne, W T Mhlongo and P M Dean.**

## Calculated and experimental PXRD patterns for Forms 1 and 2, and Calculated PXRD pattern for Form 3.

**FORM 1:**


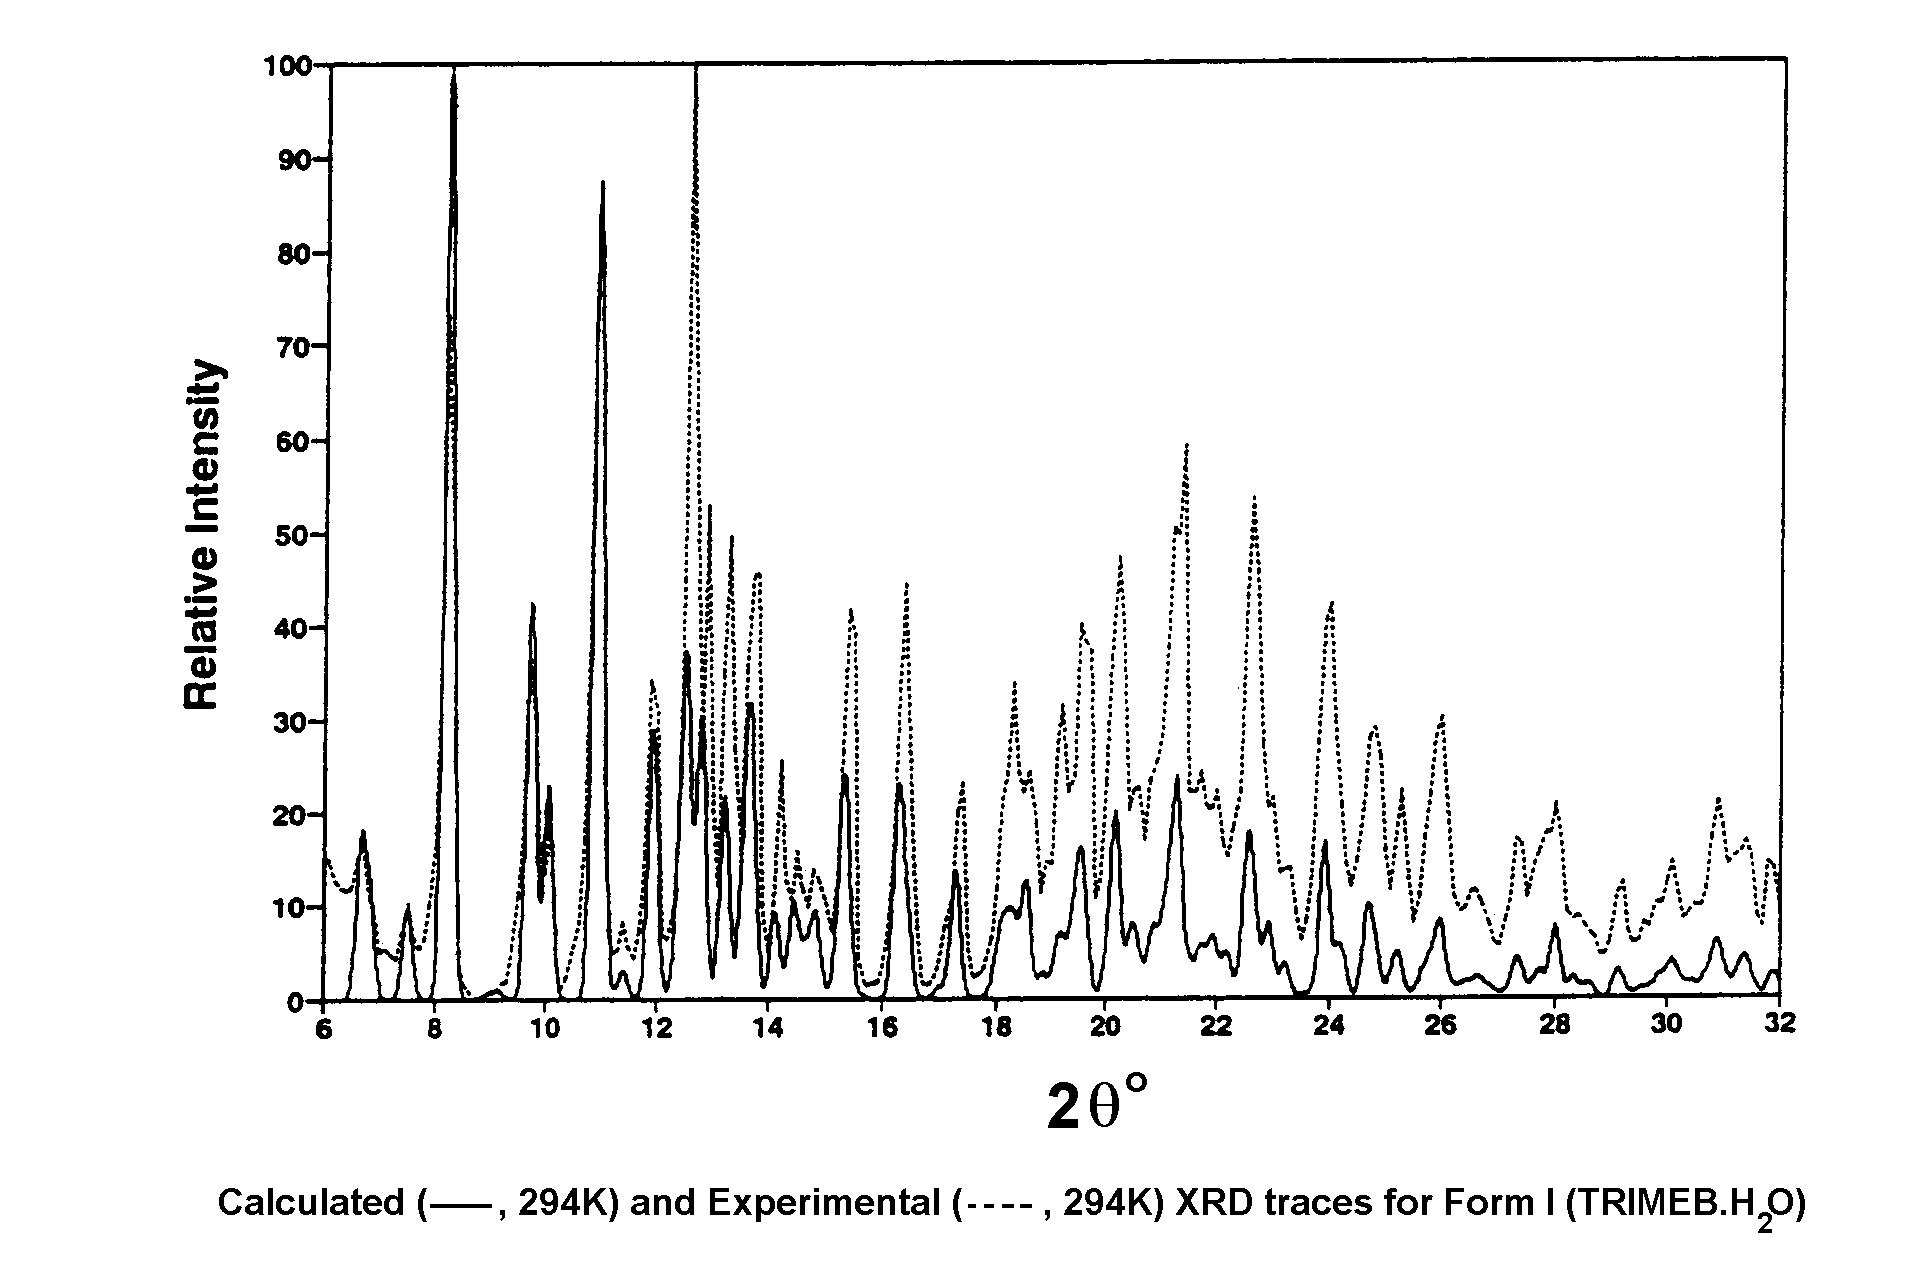


**Experimental pattern (ref. 11) recorded on a Philips PW1050/80 goniometer with Ni-filtered CuK-radiation**

**( = 1.5418Å). Calculated pattern obtained using program Lazy Pulverix (ref. 12).**

**FORMS 2 and 3:**


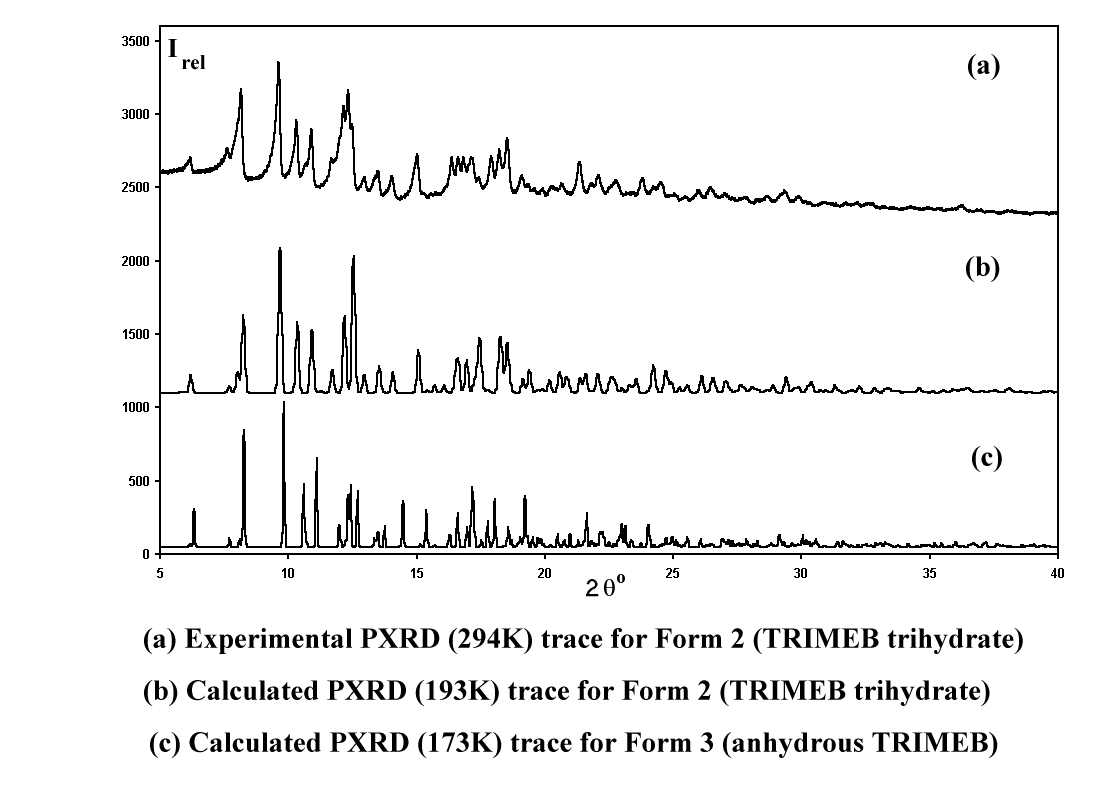


**Experimental pattern recorded on a Huber Imaging Plate Guinier Camera 670 using Ni-filtered CuK-radiation ( = 1.5418Å). Calculated pattern obtained using program Lazy Pulverix (ref. 12).**
